# Supplementary figures and images for: Bone marrow-mesenchymal stem cells are a major source of interleukin-7 and sustain colitis by forming the niche for colitogenic CD4 memory T cells
Source: PubMed Central journal article supplement — Gut. 2012 Nov 9;62(8):1142–52. doi: 10.1136/gutjnl-2012-302029 (PMC3711361; doi:10.1136/gutjnl-2012-302029), 2012-11-09

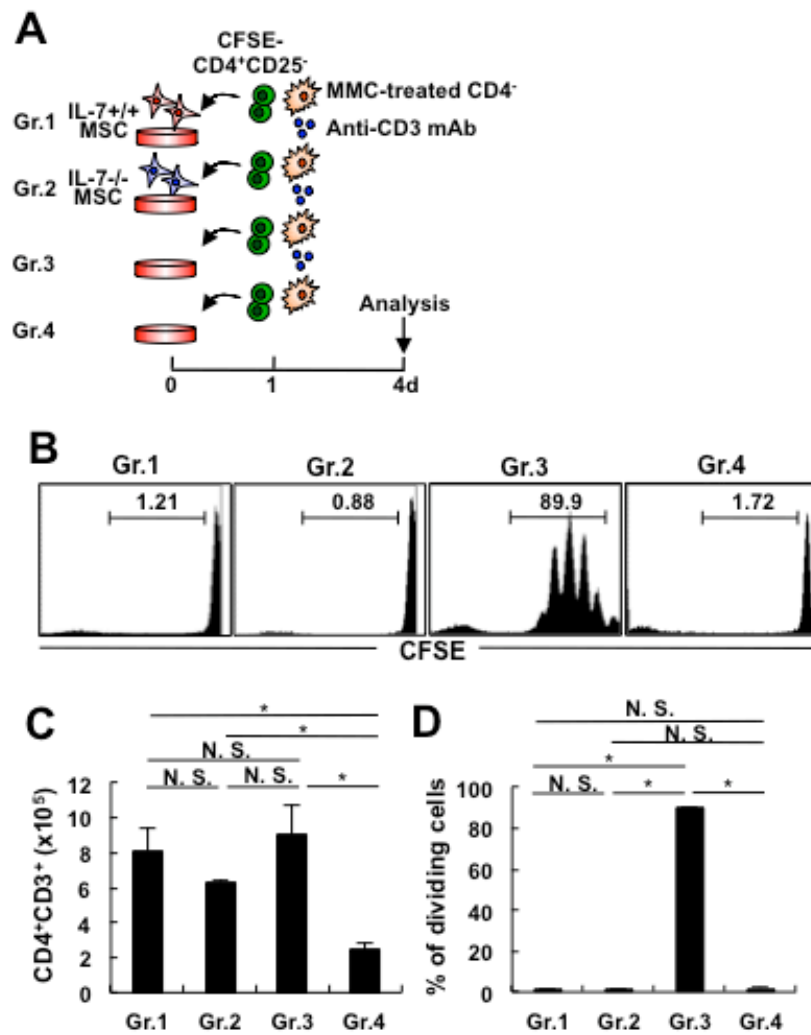

Supplement: gutjnl-2012-302029-s4.pdf [file gutjnl-2012-302029-s4.pdf]

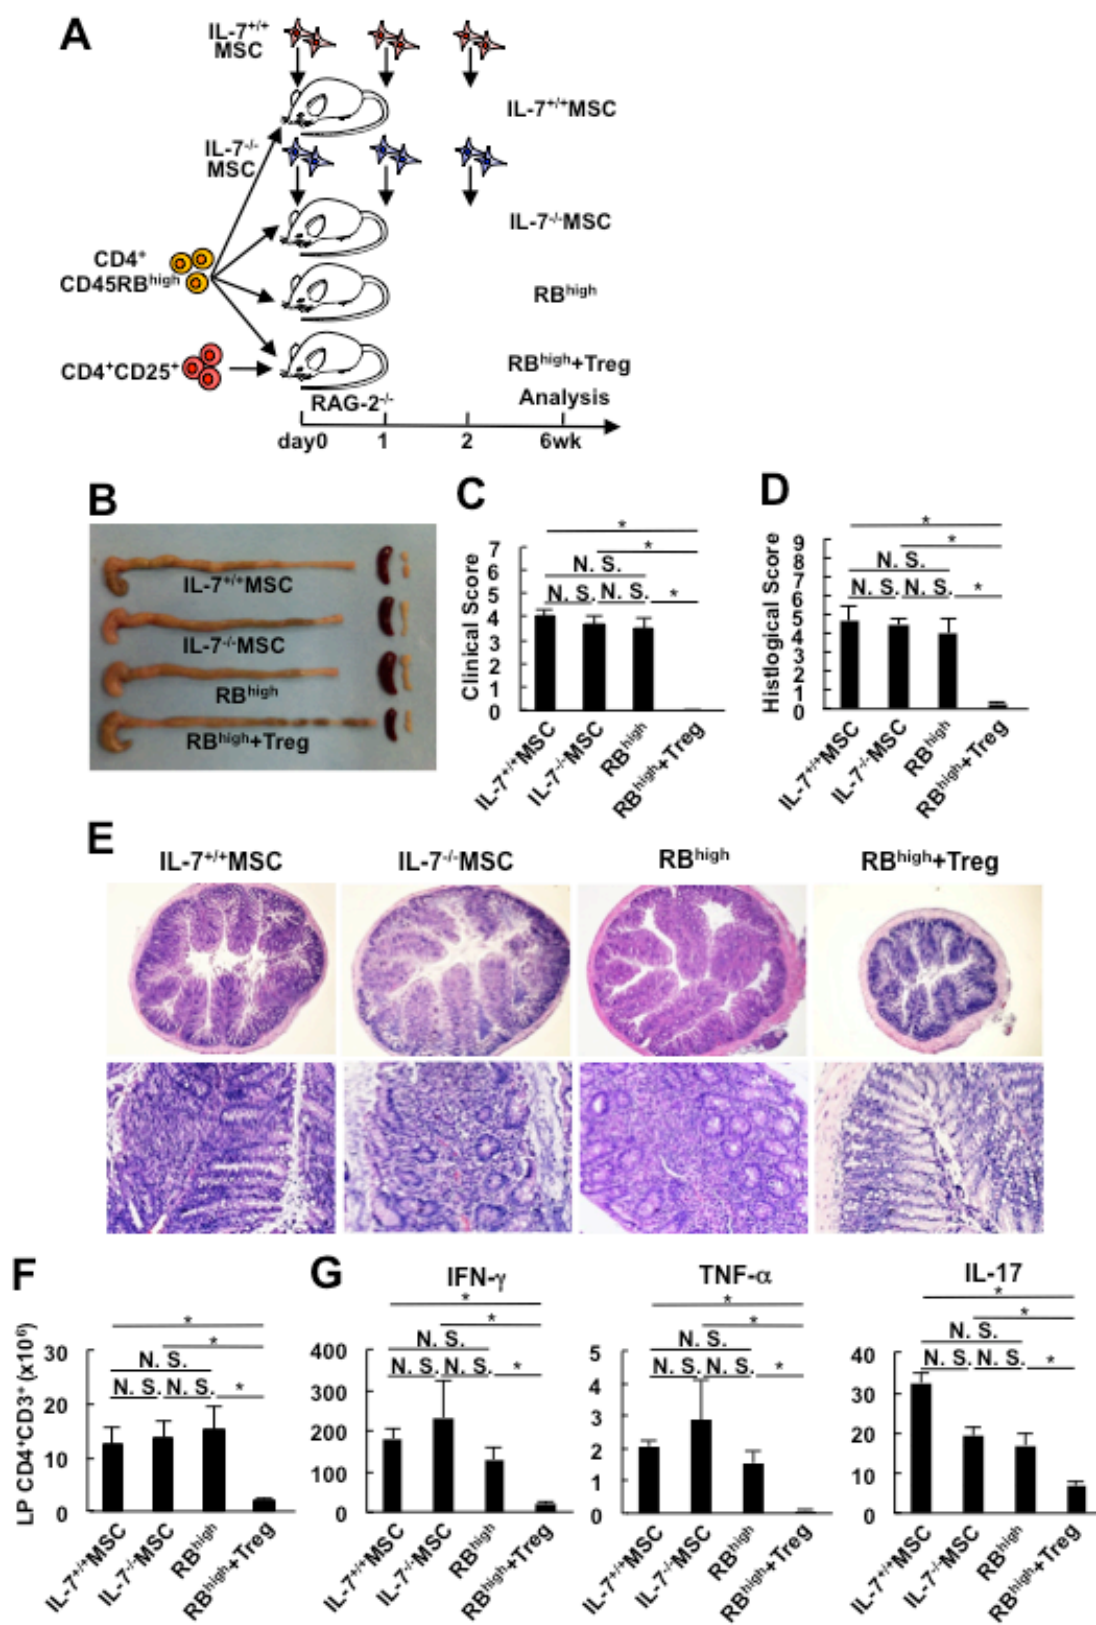

Supplemental Fig.6  
Nemoto

Supplement: gutjnl-2012-302029-s7.pdf [file gutjnl-2012-302029-s7.pdf]
