# Supplementary figures and images for: Bone marrow-mesenchymal stem cells are a major source of interleukin-7 and sustain colitis by forming the niche for colitogenic CD4 memory T cells
Source: HighWire-hosted journal article supplement (doi:10.1136/gutjnl-2012-302029), 2012-11-09

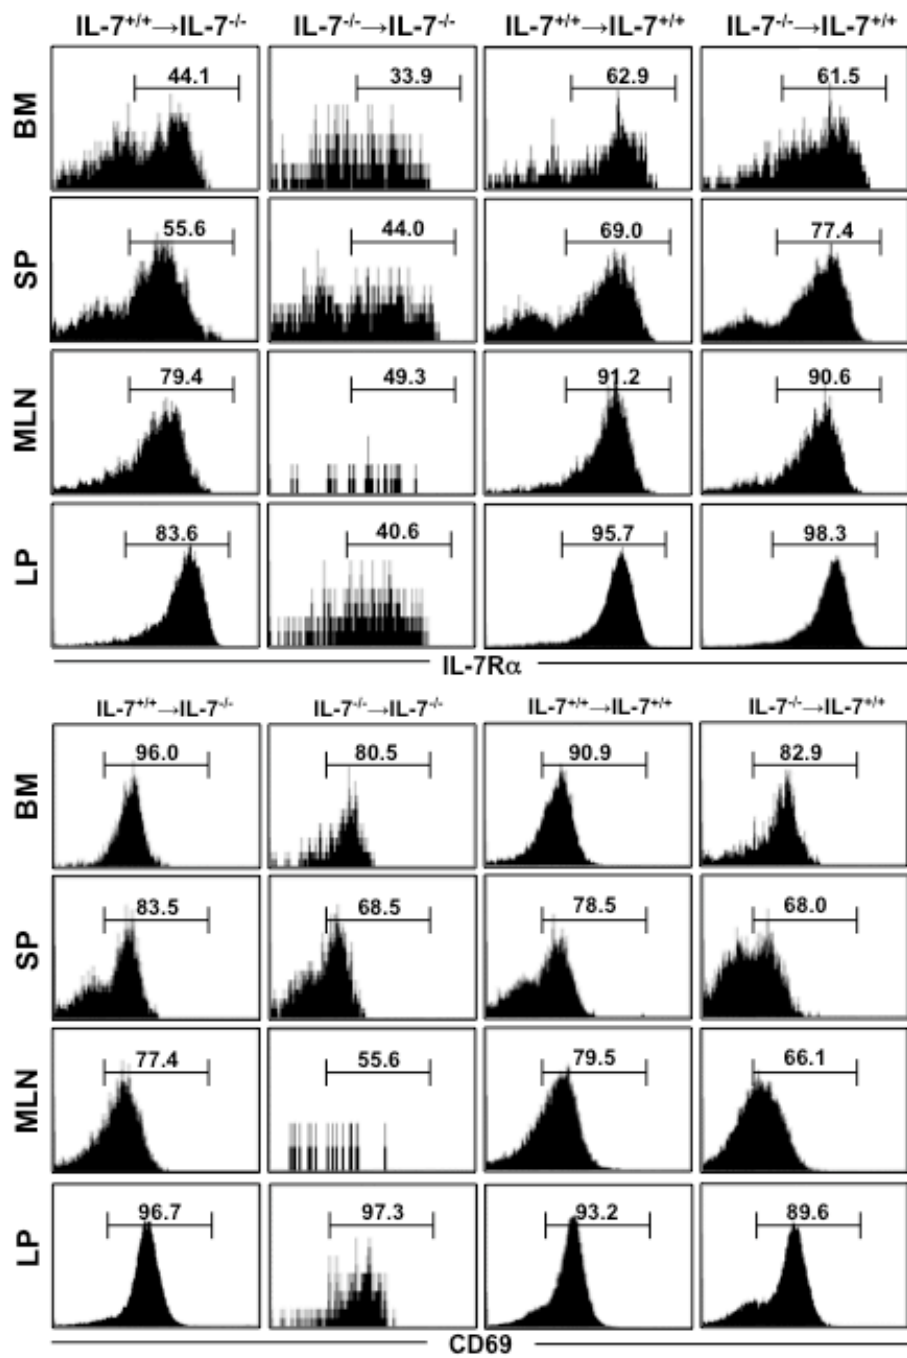

Supplemental Fig.1  
Nemoto

Supplement: gutjnl-2012-302029supp_figure1.pdf [file gutjnl-2012-302029supp_figure1.pdf]

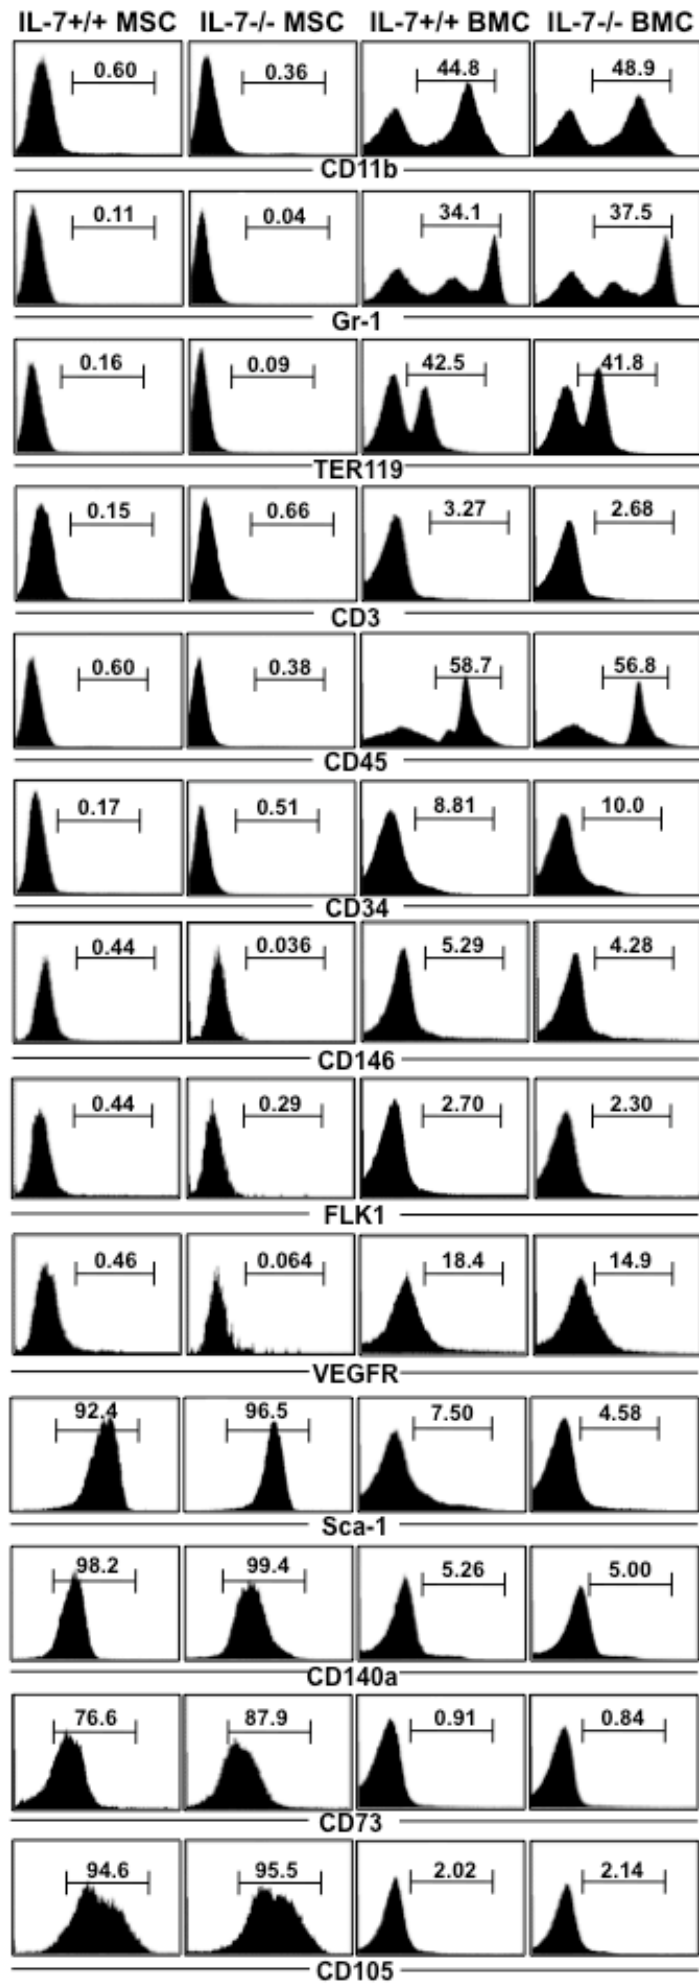

Supplemental Fig.2  
Nemoto

Supplement: gutjnl-2012-302029supp_figure2.pdf [file gutjnl-2012-302029supp_figure2.pdf]

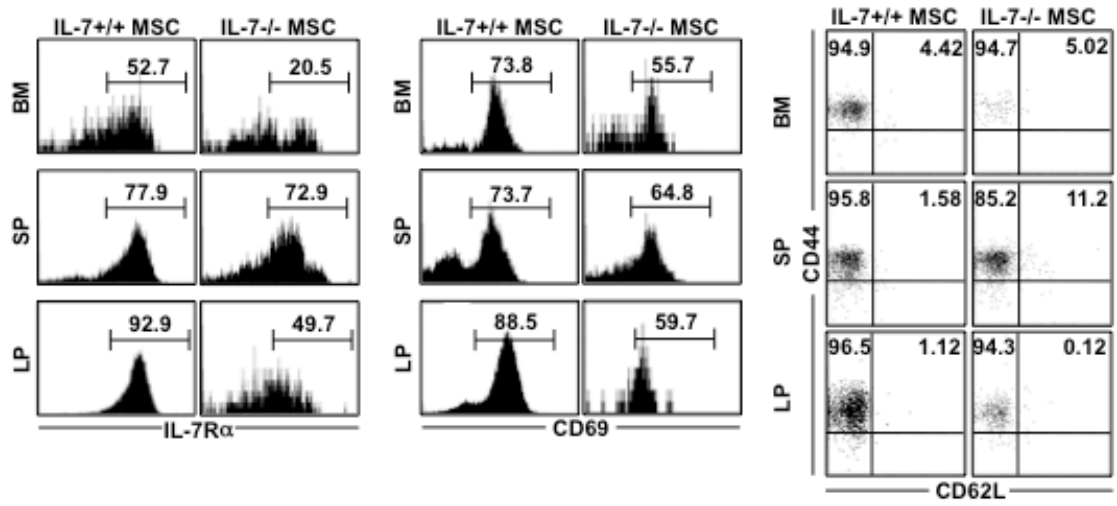

**Supplemental Fig.4**  
**Nemoto**

Supplement: gutjnl-2012-302029supp_figure4.pdf [file gutjnl-2012-302029supp_figure4.pdf]

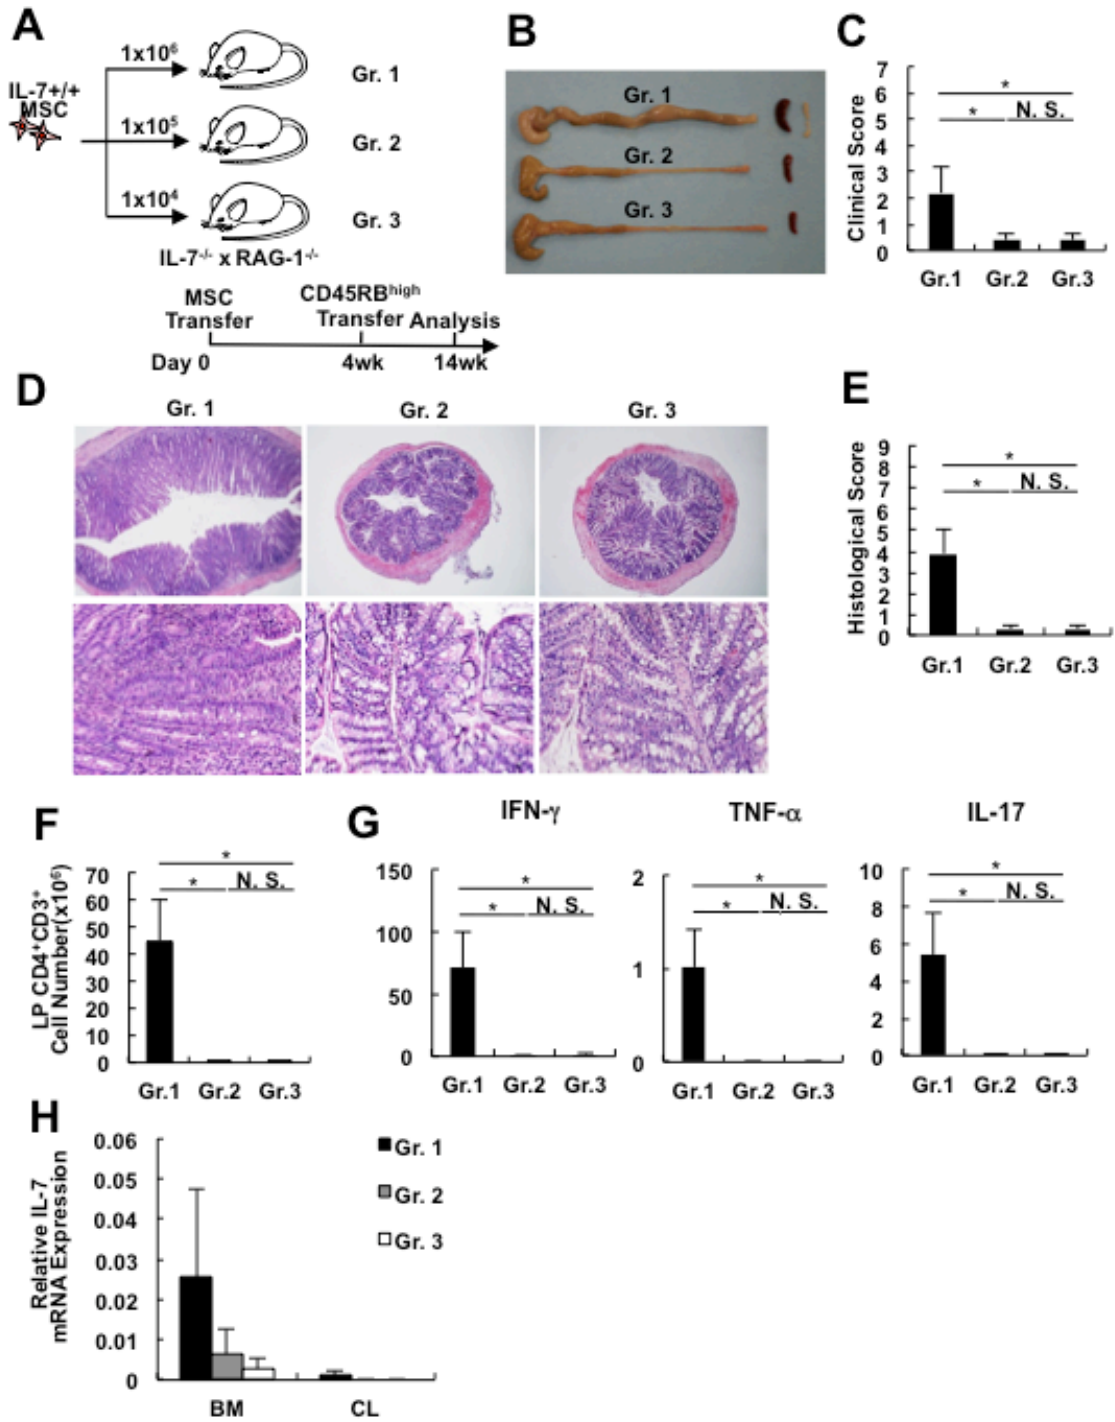

Supplement: gutjnl-2012-302029supp_figure5.pdf [file gutjnl-2012-302029supp_figure5.pdf]
